# Supplementary material
Source: PubMed Central journal article supplement (PMC3880804)
Supplement: NIHMS515172-supplement-SuppMat.pdf [file NIHMS515172-supplement-SuppMat.pdf]

**Supporting Information for the article:**

**Transduction-Specific ATLAS (TS-ATLAS) reveals a cohort of highly active  
L1 retrotransposons in human populations**

Catrina M. Macfarlane, Pamela Collier, Raheleh Rahbari, Christine R. Beck, John F. Wagstaff,  
Samantha Igoe, John V. Moran, and Richard M. Badge

## Supp. Methods

### L1 elements

For convenience previously described L1s are named as listed in Supp. Table S2. L1 elements discussed in this study are named according to their corresponding insertion site accession number from the HGR.

### DNA samples

The 9 blood samples were obtained from individuals of Northern European origin. TS-ATLAS for the LRE3 transduction was performed on the CEPH/FRENCH pedigree 12 and CEPH/UTAH pedigrees 1333, 1340, 1424, and 1347. TS-ATLAS for the 2980 transduction was carried out using the CEPH/UTAH pedigrees 1333, 1340, 1424, and 13291. Each family was selected on the basis that one copy of either LRE3 or AC002980 was segregating in the pedigree, with one grandparent being heterozygous and the remaining being homozygous for the selected transduction locus. These assays were used to verify that TS-ATLAS amplification patterns recapitulated the segregation of AC002980 and LRE3 in the pedigree, as determined by genotyping. The results of applying this procedure to 9 unrelated individuals carrying the AC002980 full-length L1 insertion are illustrated in Figure 3B in the main text.

### Library Construction and Amplification

#### *Protocol 1. TS-ATLAS RP-specific *VspI* Library Construction and Amplification*

The method is as described within the main text. Supp. Figure S1 shows a representative RP-specific TS-ATLAS display gel of 8 unrelated individuals, who necessarily lack the private disease causing L1<sub>RP</sub> insertion. Faint bands in lanes 1-8 may be L1<sub>RP</sub> related loci but present insufficient DNA for characterisation. The bright band in lane 6 corresponds to the putative L1<sub>RP</sub> progenitor element (AL050308) reported in this study.

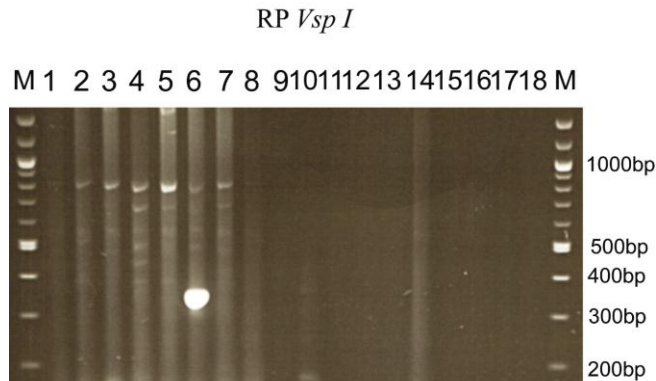

**Supp. Figure S1.** Representative TS-ATLAS Display Gel Showing the Results of Applying the RP-Specific (*VspI*) Assay. Lanes 1-8 show display patterns of 8 unrelated individuals none of whom carries the L1<sub>RP</sub> insertion. Lane 9 - Reaction in the absence of genomic DNA. Lane 10 - Reaction in the absence of restriction enzyme. Lane 11 - Reaction in the absence of genomic DNA. Lane 12 - Reaction in the absence of T4 Ligase. Lane 13 - Reactions in the absence of linker. Lane 14 - Replicate of Lane 1. Lanes 15 to 18 - Controls for PCR with DNA omitted. MW - molecular weight marker (100bp ladder (NEB)).

### ***Protocol 2. TS-ATLAS RP-specific MspI Library Construction and Amplification***

An aliquot (600ng) of genomic DNA was digested to completion with 20 units of *MspI* (NEB) in the manufacturer's recommended buffer at 37°C for 3 hours. After incubation reactions were heated to 65°C for 20 minutes to inactivate the restriction enzyme. Prior to setting up the ligation reaction, linker oligonucleotides were freshly annealed by mixing equal volumes of 20 μM RBMSL2 and RBD5, heating to 65°C for 10 minutes, and then slowly cooling to room temperature. An aliquot (100ng) of the digested DNA was ligated to a molar excess of the annealed suppression linker (2.7μl of 10uM annealed linker for *MspI* libraries) with 4 Weiss units T4 DNA ligase (Promega) in 1X Ligase Buffer (Invitrogen) overnight (~16hrs) at 15°C, in a final volume of 20μl. After ligation the reaction was heated to 70°C for 10 minutes to inactivate the ligase. Excess linkers and short DNA fragments (i.e., < 100 bp) were removed with the Qiaquick PCR purification system (Qiagen), following the manufacturer's protocol, but eluting the DNA in 30μl 5mM Tris HCl pH7.5. An aliquot (1μl) of ligated genomic DNA was amplified in 10μl PCR reactions containing 1 X PCR buffer, 1.25μM RBX4, 1.25μM RB3PA1, and 0.4 units of *Taq* DNA polymerase (ABgene). Reactions were cycled in a Tetrad 2 Thermal Cycler (MJ Research / Biorad, Hercules, CA) using the following conditions: 96°C -1min; 30 X

[96°C -30s; 58°C -30s; 72°C -1min]; 72°C -10min. Primary suppression PCR reactions were diluted 1:50 in SMDD and 1µl diluted PCR reaction was added to 9µl secondary PCR reactions containing 1 X PCR buffer, 0.625mM RBY1, 0.625mM RB011TD1, and 0.4 units of *Taq* DNA polymerase (ABgene). Reactions were cycled in a Tetrad 2 Thermal Cycler (MJ Research / Biorad, Hercules, CA) using the following conditions: 96°C -1min; 30[96°C -30s; 58°C -30s; 72°C -1min]; 72°C -10min. An aliquot (10µl) of secondary PCR products were fractionated on 2% Seakem LE (Cambrex) 0.5X TBE agarose gels against the 100bp ladder (NEB) size marker and visualised by ethidium bromide (0.5 µg/ml) staining. Novel PCR products (i.e. amplicons not corresponding in size to the suppressed known transduction locus) were excised from the gel and purified using the Qiagen Minelute system (Qiagen) following the manufacturer's protocol, but eluting the DNA in 10µl of 5mM Tris HCl pH7.5. Purified PCR products were directly sequenced with ABI BigDye Ver. 3.0 ReadyReaction, using 3.3uM RBY1 as the primer. Sequencing reactions were purified using Performa DTR spin columns (Edge BioSystems) and the sequencing data collected using an ABI 3730 capillary sequencer by the PNAACL DNA sequencing service (University of Leicester). Supp. Figure S2 illustrates a representative TS-ATLAS display gel for the RP-Specific (*MspI*) assay. Strongly amplifying bands showing variable presence absence between individuals were characterised by excision and direct sequencing. Faint bands in Lanes 1-8 may represent other  $L1_{RP}$  related loci, but were not characterised due to insufficient amplification.

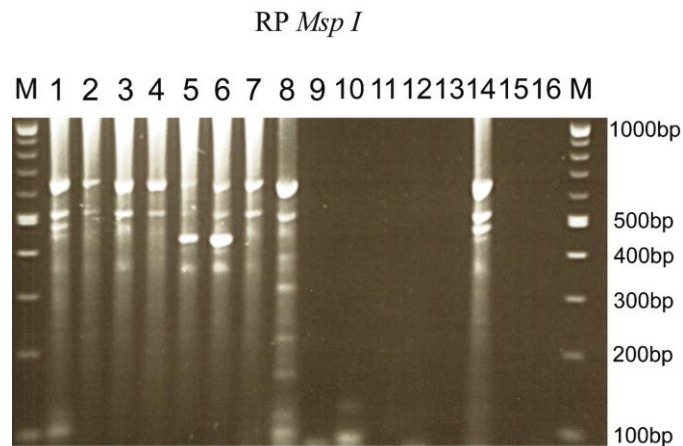

**Supp. Figure S2.** Representative TS-ATLAS Display Gel Showing the Results of Applying the RP-Specific (*MspI*) Assay. Lanes 1-8 show display patterns of 8 unrelated individuals none of whom carries the L1<sub>RP</sub> insertion. Lane 9 - Reaction in the absence of genomic DNA. Lane 10 - Reaction in the absence of restriction enzyme. Lane 11 - Reaction in the absence of genomic DNA. Lane 12 - Reaction in the absence of T4 Ligase. Lane 13 - Reactions in the absence of linker. Lane 14 - Replicate of Lane 1. Lanes 15 and 16 - Controls for PCR with DNA omitted. MW - molecular weight marker (100bp ladder (NEB)).

### ***Protocol 3. TS-ATLAS AC002980-specific NlaIII Library Construction and Amplification***

An aliquot (600ng) of genomic DNA was digested to completion with 20 units of *NlaIII* (NEB) in the manufacturer's recommended buffer at 37°C for 3 hours. Incubation reactions were heated to 65°C for 20 minutes to inactivate the restriction enzyme. Prior to setting up the ligation reaction, linker oligonucleotides were freshly annealed by mixing equal volumes of 20 μM RBMSL3 and RBD4, heating to 65°C for 10 minutes, and then slowly cooling to room temperature. An aliquot (100ng) of the digested DNA was ligated to a molar excess of the annealed suppression linker (2.7μl of 10μM annealed linker for *VspI* libraries) with 4 Weiss units T4 DNA ligase (Promega) in 1X Ligase Buffer (Invitrogen) overnight (~16hrs) at 15°C, in a final volume of 20μl. After ligation the reaction was heated to 70°C for 10 minutes to inactivate the ligase. Excess linkers and short DNA fragments (i.e., < 100 bp) were removed with the Qiaquick PCR purification system (Qiagen), following the manufacturer's protocol, but eluting the DNA in 30μl 5mM Tris HCl pH7.5. To suppress amplification of the L1 AC002980, an aliquot (10μl) of the ligation reaction was incubated with 10 units *Mun I* (Roche) for 3 hours at 37°C, in a final reaction volume of 20μl. Reactions were heated to 65°C for 20 minutes to inactivate the enzyme, cooled on ice, and centrifuged briefly. An aliquot (1μl) of ligated and

*MunI* digested genomic DNA was amplified in 10 $\mu$ l PCR reactions containing 1 X PCR buffer (45mM Tris HCl pH 8.8, 11mM NH<sub>4</sub>SO<sub>4</sub>, 0.9mM MgCl<sub>2</sub>, 6.7mM  $\beta$ -mercaptoethanol, 113  $\mu$ g/ml BSA, 1mM dNTPs), 1.25 $\mu$ M RBX4, 1.25 $\mu$ M RB980TD2 and 0.4 units of *Taq* DNA polymerase (ABgene). Reactions were cycled in a Tetrad 2 Thermal Cycler (MJ Research / Biorad, Hercules, CA) using the following conditions: 96°C -1min; 30X [96°C -30s; 59.6°C -30s; 72°C -1min]; 72°C -10min. Primary suppression PCR reactions were diluted 1:50 in Single Molecule Dilution Diluent (SMDD: 5mM Tris HCl pH7.5, 5ng/ $\mu$ l sonicated *E.coli* genomic DNA) and 1 $\mu$ l diluted PCR reaction was added to 9 $\mu$ l secondary PCR reactions containing 1 X PCR buffer, 0.625mM RBY1, 0.625mM RB980TD3, 0.4 units of *Taq* DNA polymerase (ABgene). Reactions were cycled in a Tetrad 2 Thermal Cycler (MJ Research / Biorad, Hercules, CA) using the following conditions: 96°C -1min; 30 [96°C -30s; 64°C -30s; 72°C -1min]; 72°C -10min. An aliquot (10 $\mu$ l) of secondary PCR products were fractionated on 2% Seakem LE (Cambrex) 0.5X TBE agarose gels against the 100bp ladder (NEB) size marker and visualised by ethidium bromide (0.5  $\mu$ g/ml) staining. Novel PCR products (i.e. amplicons not corresponding in size to the suppressed known transduction locus) were excised from the gel and purified using the Qiagen Minelute system (Qiagen) following the manufacturer's protocol, but eluting the DNA in 10 $\mu$ l of 5mM TrisHCl pH7.5. Purified PCR products were directly sequenced with ABI BigDye Ver. 3.0 ReadyReaction, using 3.3 $\mu$ M RBY1 as the primer. Sequencing reactions were purified using Performa DTR spin columns (Edge BioSystems) and the sequencing data collected using an ABI 3730 capillary sequencer by the PNAACL DNA sequencing service (University of Leicester). The results of applying this protocol to *NlaIII* libraries with *MunI* suppression to 9 unrelated individuals carrying the AC002980 full-length L1 insertion are illustrated in Figure 3B of the main text.

#### ***Protocol 4. TS-ATLAS AC002980-specific VspI Library Construction and Amplification***

An aliquot (600ng) of genomic DNA was digested to completion with 20 units of *VspI* (Promega) in the manufacturer's recommended buffer at 37°C for 3 hours. After incubation reactions were heated to 65°C for 20 minutes to inactivate the restriction enzyme. Prior to setting up the ligation reaction, linker oligonucleotides were freshly annealed by mixing equal volumes of 20  $\mu$ M RBMSL2 and RBD3, heating to 65°C for 10 minutes, and then slowly cooling to room temperature. An aliquot (100ng) of the digested DNA was ligated to a molar excess of the

annealed suppression linker (2.7 $\mu$ l of 10 $\mu$ M annealed linker for *VspI* libraries) with 4 Weiss units T4 DNA ligase (Promega) in 1X Ligase Buffer (Invitrogen) overnight (~16hrs) at 15°C, in a final volume of 20 $\mu$ l. After ligation the reaction was heated to 70°C for 10 minutes to inactivate the ligase. Excess linkers and short DNA fragments (i.e., < 100 bp) were removed with the Qiaquick PCR purification system (Qiagen), following the manufacturer's protocol, but eluting the DNA in 30 $\mu$ l 5mM TrisHCl pH7.5. An aliquot (1 $\mu$ l) of ligated genomic DNA was amplified in 10 $\mu$ l PCR reactions containing 1 X PCR buffer, 1.25 $\mu$ M RBX4, 1.25 $\mu$ M RB3PA1, and 0.4 units of *Taq* DNA polymerase (ABgene). Reactions were cycled in a Tetrad 2 Thermal Cycler (MJ Research / Biorad, Hercules, CA) using the following conditions: 96°C -1min; 30X [96°C -30s; 59.6°C -30s; 72°C -1min]; 72°C -10min. Primary suppression PCR reactions were diluted 1:50 in SMDD and 1 $\mu$ l diluted PCR reaction was added to 9 $\mu$ l secondary PCR reactions containing 1 X PCR buffer, 0.625mM RBY1, 0.625mM RB980TD3, 0.4 units of *Taq* DNA polymerase (ABgene). Reactions were cycled in a Tetrad 2 Thermal Cycler (MJ Research / Biorad, Hercules, CA) using the following conditions: 96°C -1min; 30X [96°C -30s; 64°C -30s; 72°C -1min]; 72°C -10min. An aliquot (10 $\mu$ l) of secondary PCR products were fractionated on 2% Seakem LE (Cambrex) 0.5X TBE agarose gels against the 100bp ladder (NEB) size marker and visualised by ethidium bromide (0.5  $\mu$ g/ml) staining. Novel PCR products (i.e. amplicons not corresponding in size to the suppressed known transduction locus) were excised from the gel and purified using the Qiagen Minelute system (Qiagen) following the manufacturer's protocol, but eluting the DNA in 10 $\mu$ l of 5mM Tris HCl pH7.5. Purified PCR products were directly sequenced with ABI BigDye Ver. 3.0 ReadyReaction, using 3.3 $\mu$ M RBY1 as the primer. Sequencing reactions were purified using Performa DTR spin columns (Edge BioSystems) and the sequencing data collected using an ABI 3730 capillary sequencer by the PNAACL DNA sequencing service (University of Leicester). Supp. Figure S3 illustrates how the presence of the AC002980 amplicon (strong band ~300bp) inhibits amplification of related transduction carrying amplicons (weak bands), necessitating the use of enzymatic treatment to suppress this amplicon, as used in protocol 1.

AC002980 *Vsp I*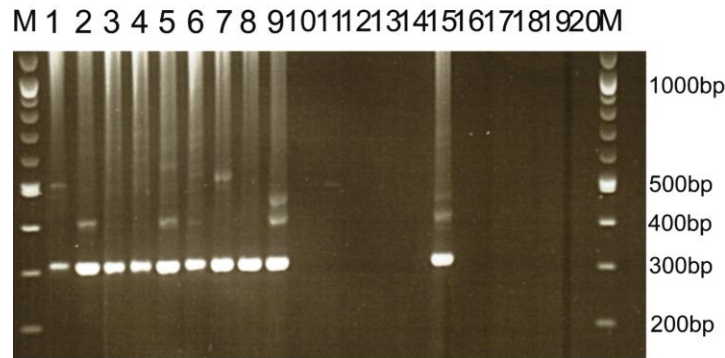

**Supp. Figure S3.** Representative TS-ATLAS Display Gel Showing the Results of Applying the AC002980-Specific (*VspI*) Assay. Lanes 1-9 show display patterns of 9 unrelated individuals. Lane 10 - Reaction in the absence of genomic DNA. Lane 11 - Reaction in the absence of restriction enzyme. Lane 12 - Reaction in the absence of genomic DNA. Lane 13 - Reaction in the absence of T4 Ligase. Lane 14 - Reaction in the absence of linker. Lane 15 - Replicate of Lane 9. Lanes 16 to 20 - Controls for PCR with DNA omitted. MW - molecular weight marker (100bp ladder (NEB)).

**Protocol 5. TS-ATLAS LRE3-specific *MseI* Library Construction and Amplification**

An aliquot (600ng) of genomic DNA was digested to completion with 15 units of *MseI* (NEB) in the manufacturer's recommended buffer at 37°C for 3 hours. After incubation reactions were heated to 65°C for 20 minutes to inactivate the restriction enzyme. Prior to setting up the ligation reaction, linker oligonucleotides were freshly annealed by mixing equal volumes of 20 μM RBMSL2 and RBD3, heating to 65°C for 10 minutes, and then slowly cooling to room temperature. An aliquot (100ng) of the digested DNA was ligated to a molar excess of the annealed suppression linker (2.7 μl of 10 μM annealed linker for *MseI* libraries) with 4 Weiss units T4 DNA ligase (Promega) in 1 X Ligase Buffer (Invitrogen) overnight (~16hrs) at 15°C, in a final volume of 20 μl. After ligation the reaction was heated to 70°C for 10 minutes to inactivate the ligase. Excess linkers and short DNA fragments (*i.e.*, < 100 bp) were removed with the Qiaquick PCR purification system (Qiagen), following the manufacturer's protocol, but eluting the DNA in 30 μl 5mM Tris HCl pH7.5. To suppress amplification of known transduction locus (loci?) 10 μl of the ligation reaction was incubated with 10 units *Bbs I* (NEB) for 3 hours at 37°C, in a final reaction volume of 20 μl. Reactions were heated to 65°C for 20 minutes to



inactivate the enzyme, cooled on ice, and centrifuged briefly. An aliquot (1 $\mu$ l) of ligated and *Bbs* I digested genomic DNA was amplified in 10 $\mu$ l PCR reactions containing 1 X PCR buffer, 1.25 $\mu$ M RBX4, 1.25 $\mu$ M RB3PA1, and 0.4 units of *Taq* DNA polymerase (ABgene). Reactions were cycled in a Tetrad 2 Thermal Cycler (MJ Research / Biorad, Hercules, CA) using the following conditions: 96°C -1min; 30 X [96°C -30s; 59.6°C -30s; 72°C -1min]; 72°C -2min. Primary suppression PCR reactions were diluted 1:50 in SMDD and 1 $\mu$ l diluted PCR reaction was added to 9 $\mu$ l secondary PCR reactions containing 1 X PCR buffer, 0.625mM RBY1, 0.625mM CM958TD1, and 0.4 units of *Taq* DNA polymerase (ABgene). Reactions were cycled in a Tetrad 2 Thermal Cycler (MJ Research / Biorad, Hercules, CA) using the following conditions: 96°C -1min; 30X [96°C -30s; 59.6°C -30s; 72°C -1min]; 72°C -2min. An aliquot (10 $\mu$ l) of secondary PCR products were fractionated on 2% Seakem LE (Cambrex) 0.5X TBE agarose gels against the 100bp ladder (NEB) size marker and visualised by ethidium bromide (0.5  $\mu$ g/ml) staining. Novel PCR products (i.e. amplicons not corresponding in size to the suppressed known transduction locus) were excised from the gel and purified using the Qiagen Minelute system (Qiagen) following the manufacturer's protocol, but eluting the DNA in 10 $\mu$ l of 5mM TrisHCl pH7.5. Purified PCR products were directly sequenced with ABI BigDye Ver. 3.0 ReadyReaction, using 3.3 $\mu$ M RBY1 as the primer. Sequencing reactions were purified using Performa DTR spin columns (Edge BioSystems) and the sequencing data collected using an ABI 3730 capillary sequencer by the PNAFL DNA sequencing service (University of Leicester). Supp. Figure S2 illustrates a representative TS-ATLAS display gel for the LRE3-Specific (*Mse*I) Assay. In the absence of the LRE3 suppressing restriction enzyme *Bbs*I only the LRE3 amplicon is generated (Supp. Figure S2, lane 14, ~350bp band). With *Bbs*I digestion (Supp. Figure S4, Lanes 1-8) a range of differently sized fragments can amplify to levels consistent with excision and cloning. Faint bands in Lanes 1-8 may represent other LRE3 related loci, but were not characterised due to insufficient amplification.

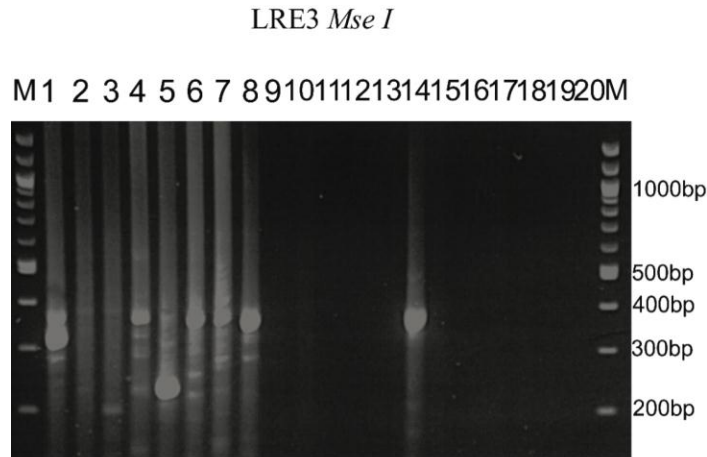

**Supp. Figure S4.** Representative TS-ATLAS Display Gel Showing the Results of Applying the LRE3-Specific (*Mse*I) Assay. Lanes 1-8 show display patterns of 8 unrelated individuals. Lane 9 - Reaction in the absence of genomic DNA. Lane 10 - Reaction in the absence of restriction enzyme (*Mse*I). Lane 11 - Reaction in the absence of genomic DNA. Lane 12 - Reaction in the absence of T4 Ligase. Lane 13 - Reactions in the absence of linker. Lane 14 - Reaction in the absence of suppression enzyme digestion (*Bbs*I). Lanes 15 to 20 Control for PCR with DNA omitted. MW - molecular weight marker (100bp ladder (NEB)).

## Results

### *In Silico Recovery of L1s belonging to Active Transduction Lineages within the HGR (hg18)*

In total 6 L1 elements belonging to the transduction lineages AC002980, LRE3, and L1<sub>RP</sub> were detected within the HGR; for further detail refer to Table 1 in the main text and Supp. Table S2.

**AC002980:** the transduction of the L1 AC002980 produced three BLAT hits with >98% identity which were preceded by an L1. The first corresponded to the L1 AC002980 (chrX: 11863136-11863323), the second a 5' truncated L1 AC010387 (chr5: 24406320-24406557), and the third a full length L1 AL118519 (chr6: 70782984-70783219). L1 AC010387 is a 5' truncated and inverted L1 2563bp in length, and flanked by TSDs of 14bp. L1 AL118519 was a full length L1HS which contained a 1bp frameshifting deletion within ORF2. Comparison of the three 3' flanking sequences and locations of each of the L1 TSDs indicated that AC002980 and AC010387 were likely derived from AL118519 (Figure 4A). An overview of the AC002980

transduction alignment and its implication for variable polyadenylation is presented in Figure 4B of the main text. A detailed, annotated alignment of the transduced sequence with primer and restriction sites is presented in Supp. Figure S5.

**L1<sub>RP</sub>**: the poly(A) tail and 11bp transduced sequence of L1<sub>RP</sub> yielded two BLAT hits with >95% identity which were preceded by an L1. The first, AC093861 (chr4: 44202044 – 44202074), was a 5' truncated L1 and did not appear to have any TSDs. The second, AC005939 (chr17: 65972606-65972764), was a full length L1 containing a stop codon within ORF2 and was flanked by 11bp TSDs (Figure 2A). A detailed, annotated alignment of the transduced sequence with primer and restriction sites is presented in Supp. Figure S6.

**LRE3**: *in silico* searches using the transduction of LRE3 produced an exact match on the long arm of chromosome 2, however no full length L1 preceded the transduced sequence indicating that the polymorphic L1<sub>LRE3</sub> was not present within the HGR (Brouha et al., 2002). No further L1s containing the LRE3 transduction were detected in the HGR (Figure 2B). A detailed, annotated alignment of the transduced sequence with primer and restriction sites is presented in Supp. Figure S7.

### ***Screening for novel L1s belonging to Active Transduction Lineages within the 1000 Genomes Pilot data***

The observation that none of the novel L1 insertions discovered using active lineage specific TS-ATLAS were reported in bioinformatic analyses of the 1000 Genomes Pilot study sequence data, prompted *in silico* screening. Examination of overlap between our genotyping panel and the 1000 Genomes study cohort revealed individuals carrying novel TS-ATLAS elements that were not reported by Ewing and Kazazian 2011, among them the putative L1<sub>RP</sub> progenitor, AL050308. To discriminate whether this incongruity arose due to stochastic coverage within the 1000 Genomes pilot dataset, or the methodological challenge of mapping insertions carrying long repetitive transductions with short read data we screened the 1000 Genomes Pilot 1, Pilot 2 and Pilot 3 sequence read archives (derived from 375 individuals) for evidence of TS-ATLAS captured insertions. Briefly, for each pilot study and individual, 454 sequence reads >45 bp in length were downloaded and converted to BLAST-formatted databases [~1.6 billion reads in total]. 300 bp of genomic DNA sequence flanking the insertion point of TS-ATLAS recovered elements, that were absent from the HGR (hg18), were used as queries for MegaBLAST

(v2.2.26) searches (Zhang *et al.*, 2000). Command line options were : megablast -F F -p 80 -b 50000 -v 50000. Alignments <45 bp and <95% identity were filtered out. The filtered BLAST output was parsed with a specifically designed perl script (available on request) to identify junction sequence reads that could be unequivocally mapped to TS-ATLAS element insertion points and that contained non-aligned sequences. Annotated results were stored in a MySQL database and accessed using custom queries. The non-aligned sequences were identified as L1 derived (5') or poly A tail / transduction derived (3') by re-alignment and manually verified by inspection. Elements with at least one incontrovertible junction read, with high similarity to the known insertion sequence, are indicated by the letter Y in the third column ("Detected in 1000G" of Table 1. Most insertions were supported by more than one read – the unique read identifier and positioning (5' or 3') of these reads is shown in Supp. Table S3.

**Supp. Figure S5**

L1 Sequence    
  Poly A tail    
  TSD    
  TS-ATLAS Primer Locations    
  Polyadenylation Signal  
 Restriction Enzyme site    
 AL118519 Transduced Sequence    
 AC002980 Transduced Sequence

```

AL118519 CACAATGTGCACATGTACCCTAAAACCTTAGAGTATAATAAAAAAAAAAAAAAAAAACACATGAAAAAAAAAAAAAAA CAAAACAAAACAAAGCAAACATGGAA
AC010387
AC004740
AC048382
AP001029
AC010749
AC069023
AC002980
AC116311
AP001604
    
```

```

AL118519 ATGTTTGTATTATTTAATTGTTATGATGGTTTCATGGCTGTTTGCATGTGTCAAACCTCATCAAATTTGTGTACGTTAAATATGTGAAACTTATTGTAATGC
AC010387
AC004740
AC048382
AP001029
AC010749
AC069023
AC002980
AC116311
AP001604
    
```

```

AL118519 TGGTTACACCTCAATAAAGCTGTTAAATTTTTTTAAATTTAAAAATATTATTTCAAGAATAAAATAACCAAACCATATTCTGGGAGCAAGTATTTGCAA
AC010387
AC004740
AC048382
AP001029
AC010749
AC069023
AC002980
AC116311
AP001604
    
```

```

AL118519 TTATATATCTGATAAATGACTTGTATCAATAATACATAAAGAAGCTTTTACAACCTCACAATAAGAAGGCAAACCTAAAAATGAAAAAAGATTTAAATAGA
    
```

AC010387 AATTTTGTTTTAAAAAGTAATTAATAATTGGAATGATTATTTATTTTGGGGATATAGATATGAAGAAAAATATTTTCAAACCATTAACAATTTTTAATA  
 AC004740 AAACAATATGTAATGTTTCACTTAATATTTTGTAACTTGTTTACCTTGAAGTCTACTTTGTCCAATGTTAAGATATTTTCAGTTTTTTTTATGATTACTGT  
 AC048382 AGAGTTTTTATTAGTTTTCTTTTTATTTGTTTCATTGTTTATTTGTTTGTTCCTTTGTGCAAGCAGTGCAAAGTTGTCATCAGTTTAAATAATGGGTTAT  
 AP001029 ATGGAACCACAAAAGACAATGAATAGCCAATCAATCTTGAGAAAGAATAACAAAGCCAGAGACATCACACTTTCTGATCTTACAATATATTATAAAGTTA  
 AC010749 GAGAACATG  
 AC069023 TCAGCAAACCTGAACTAAGCATCTGTTATGCACTGTTTAAATGCTGGAGGCCTGAAAGCTTTGGGGGACTAAACACATCCCCATAAAGATTTGAATTTAC  
 AC002980 TTTATTGACAAATTGGTGTATATGAAAGACCTCGACCTTCAACATTCACAAGAAAAGATCAATTGCATGTAATTTGTCTTGCCCGTAATTTTGCTGTTCA  
 AC116311 TTTATTGACAAATTGGTGTATATGAAAGACCTCGACCTTCAACATTCACAAGAAAAGATCAATTGCATGTAATTTGTCTTGCCCGTAATTTTGCTGTTCA  
 AP001604 AAAAGAAAGTGCCCTGTAGTCCTTTCAACCACTGGGTGGATACACCAAAATGTGAGAAACAGTGTGGGTAAAGTAACGATGCCACCCAGAAAAGTAAAAC

AL118519 TGATTCTTCAAAGAAGATATGTGAATGTCTAACAAGCAGAGGAAATGATCATTAAT  
 AC010387 TTTAGTAGACACCATTTAATATAATAGCAAAACTGAGTTTTTTAATGATGTCTCGGTTTCATTGTATTTAAAGAGTTTCTCATTGGAAAAATATGGGAA  
 AC004740 TTGCATG  
 AC048382 AAGATGGTATTTCCAAGCCTCATG  
 AP001029 CAATAACAAAACAGCATG  
 AC010749  
 AC069023 TTTATTCTATGGACATTAGGGAGCCAGTCACTCTTGAGAGGCAGGTTAGTGTGTAAGTAGAGAGCTGGAATGGCTGGGGGACAAACGGTCTCCAAGGAGC  
 AC002980 CATAATATGGTGAAGATCCCTCTTACGCTACAAACAAATTAATTAACAACAACAACAACAACAAAAA  
 AC116311 CATAATATGGTGAAGATCCCTCTTACGCTACAAACAAATTAATTAACAACAACAACAACAACAACAAAAA  
 AP001604 AAGCCAAGTGCCAGATTTTGGTTAAAGTATATAAGACACAGACAGGCTTCTGGCCAAAGATACAGAGAAGCAGGAATAAAAGAAAAACAAATGTAAATAA

AL118519  
 AC010387 GCATTATATGAATGTAAATTTGAGCATATAAAATTTGATAGATCCATTATAAGATTAAT  
 AC004740  
 AC048382  
 AP001029  
 AC010749  
 AC069023 CTCCGCCACCATAGCCACATG  
 AC002980  
 AC116311 TAATGTAACTAAGGAGGTGAACGATTTCTACAAGAAAACTACAAAACACTGAAAGGAATTATAGATGACACAAATGGTAAATATCCCATGCTCCTACAT  
 AP001604 AGAATGACCAGTATAGAATTCAAAATAAAAAAGTAAAACGAGAGAAAATGTGCCACACCCAGAGCCCTTCTGGAAGTTTTCAAACCCAGAATTTACTGA

AL118519  
 AC010387  
 AC004740  
 AC048382  
 AP001029  
 AC010749  
 AC069023  
 AC002980

```
AC116311 TAGAATAATTAAT
AP001604 GGGAAATGGAAATAGTTATAACATATTTCTAAACCCCGCTTGTCATAGTTGATT GGGCTAGGAGTGAGCTGAGCATCTAATCCAAACCTAACAAACTCTAG
```

```
AL118519
AC010387
AC004740
AC048382
AP001029
AC010749
AC069023
AC002980
AC116311
AP001604 GGTGACCAGAATTCTATGGAGTAC
```

**Supp. Figure S5.** Transduction Family: AC002980. Alignment showing L1 transduced sequences, polyadenylation signals and TSDs. The location of primers and restriction enzymes used in TS-ATLAS are also shown. All L1 sequences shown were recovered using TS-ATLAS.

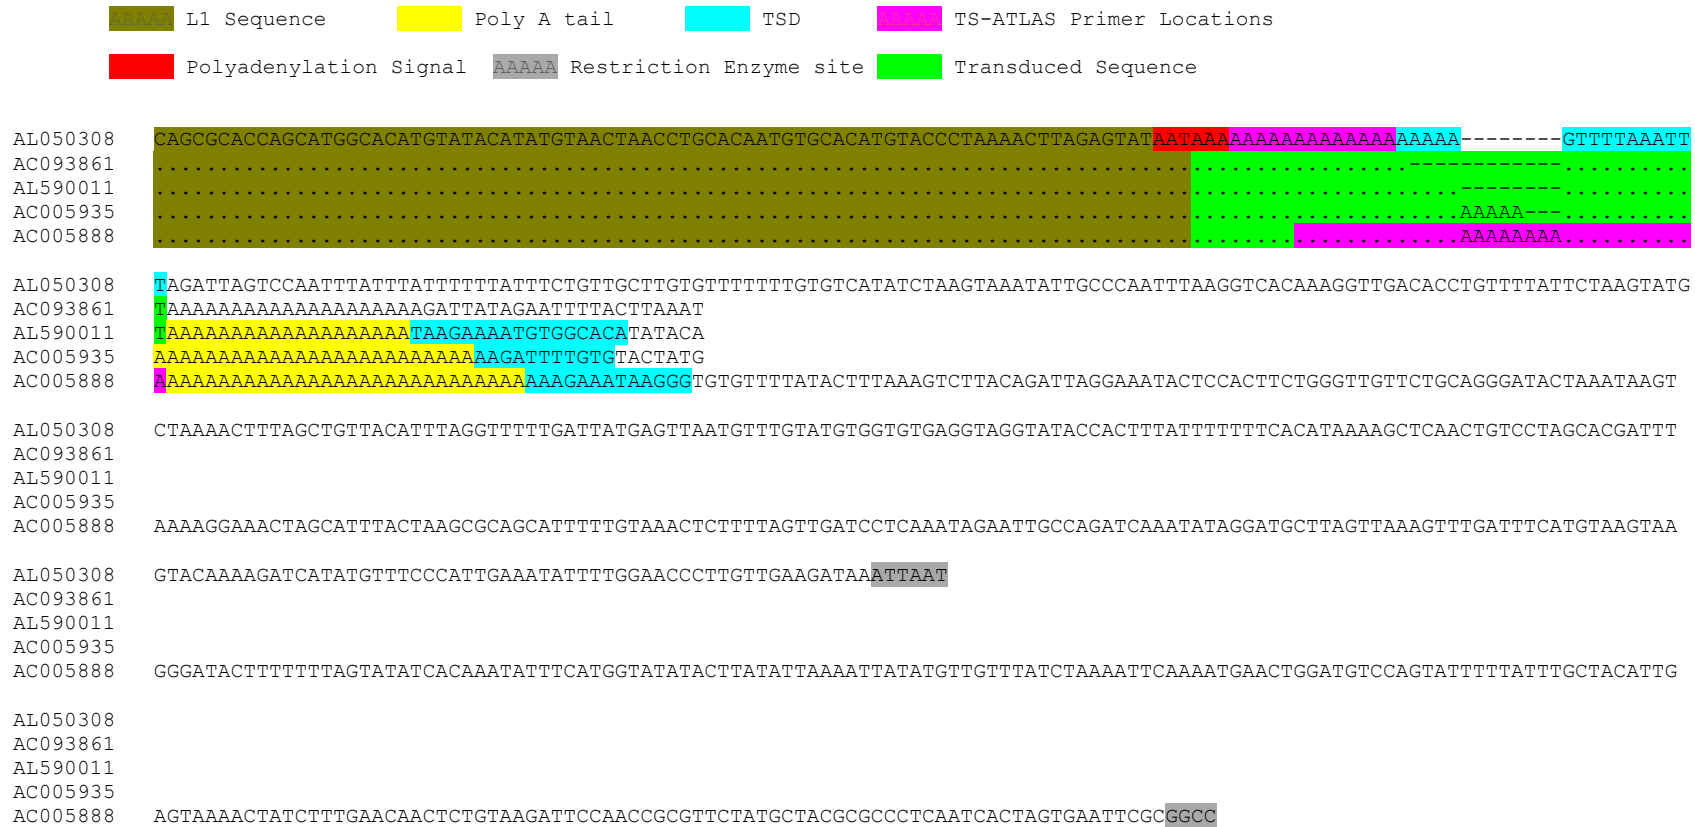

**Supp. Figure S6.** Transduction Family: RP. Alignment showing L1 transduced sequences, polyadenylation signals and TSDs. The location of primers and restriction enzymes used in TS-ATLAS are also shown. AC093861 and AC005935 were present within the human genome assembly and AL590011 was recovered from fosmids. AL050308 and AC05888 were recovered using TS-ATLAS.



Supp. Figure S7

L1 Sequence     
 Poly A tail     
 TSD     
 TS-ATLAS Primer Locations  
Polyadenylation Signal     
AAAAA Restriction Enzyme site     
Transduced Sequence

|                                                                                  |                                                                                                                                                                                                                                                                                                                                                                                                                                                                                                                                                                                                                                                                   |
|----------------------------------------------------------------------------------|-------------------------------------------------------------------------------------------------------------------------------------------------------------------------------------------------------------------------------------------------------------------------------------------------------------------------------------------------------------------------------------------------------------------------------------------------------------------------------------------------------------------------------------------------------------------------------------------------------------------------------------------------------------------|
| AC067958<br>AL031548<br>AC068286<br>AC091138<br>AL353685<br>AL592182<br>BX927359 | <div style="background-color: #8B4513; padding: 2px;">TACCTAATGCTAGATGACACATTAGTGGGTGCAGCGCACCAGCATGGCACATGTATACATATGTAACCTAACCTGCACAATGTGCACATGTACCCTAAAACCTAGAGTATAATAAAAAA</div> <div style="background-color: #00FF00; padding: 2px;">.....</div> |
|----------------------------------------------------------------------------------|-------------------------------------------------------------------------------------------------------------------------------------------------------------------------------------------------------------------------------------------------------------------------------------------------------------------------------------------------------------------------------------------------------------------------------------------------------------------------------------------------------------------------------------------------------------------------------------------------------------------------------------------------------------------|

|                                                                                  |                                                                                                                                                                                                                                                                                                                                                                                                                                                                                                                                                             |
|----------------------------------------------------------------------------------|-------------------------------------------------------------------------------------------------------------------------------------------------------------------------------------------------------------------------------------------------------------------------------------------------------------------------------------------------------------------------------------------------------------------------------------------------------------------------------------------------------------------------------------------------------------|
| AC067958<br>AL031548<br>AC068286<br>AC091138<br>AL353685<br>AL592182<br>BX927359 | <div style="background-color: #FFFF00; padding: 2px;">AAAAAAAAAAAAAAAAA</div> <div style="background-color: #00FF00; padding: 2px;">.....</div> |
|----------------------------------------------------------------------------------|-------------------------------------------------------------------------------------------------------------------------------------------------------------------------------------------------------------------------------------------------------------------------------------------------------------------------------------------------------------------------------------------------------------------------------------------------------------------------------------------------------------------------------------------------------------|

|                                                                                  |                                                                                                                                                                                                                                                                                                                                                                                                                                                                                                                                                                                                                                                                                                                                                                                                                                                                                                                                                                                                     |
|----------------------------------------------------------------------------------|-----------------------------------------------------------------------------------------------------------------------------------------------------------------------------------------------------------------------------------------------------------------------------------------------------------------------------------------------------------------------------------------------------------------------------------------------------------------------------------------------------------------------------------------------------------------------------------------------------------------------------------------------------------------------------------------------------------------------------------------------------------------------------------------------------------------------------------------------------------------------------------------------------------------------------------------------------------------------------------------------------|
| AC067958<br>AL031548<br>AC068286<br>AC091138<br>AL353685<br>AL592182<br>BX927359 | <div style="background-color: #00FF00; padding: 2px;">-----GAGAAAAGCAAAATGTCTATTCCGGTCTATTGCCTATTTTTGAAATTGGATTTTGGTTTCTTGCTATTGAGTTGTTGAGTTCCTTATATATTTTG</div> <div style="background-color: #00FF00; padding: 2px;">-----GAAAGAAAGAAAGAAA</div> <div style="background-color: #00FF00; padding: 2px;">-----GAAAGAAAGAAAGAAA</div> <div style="background-color: #00FF00; padding: 2px;">AAGAAAGAAAGAAAGAAAGAAA</div> <div style="background-color: #00FF00; padding: 2px;">-----GAAAGAAAGAAAGAAA</div> <div style="background-color: #00FF00; padding: 2px;">-----GAAAGAAAGAAA</div> <div style="background-color: #00FF00; padding: 2px;">.....</div> |
|----------------------------------------------------------------------------------|-----------------------------------------------------------------------------------------------------------------------------------------------------------------------------------------------------------------------------------------------------------------------------------------------------------------------------------------------------------------------------------------------------------------------------------------------------------------------------------------------------------------------------------------------------------------------------------------------------------------------------------------------------------------------------------------------------------------------------------------------------------------------------------------------------------------------------------------------------------------------------------------------------------------------------------------------------------------------------------------------------|

|                                                                                  |                                                                                                                                                                                                                                                                                                                                                                                                                                                                                                                                                                                                                           |
|----------------------------------------------------------------------------------|---------------------------------------------------------------------------------------------------------------------------------------------------------------------------------------------------------------------------------------------------------------------------------------------------------------------------------------------------------------------------------------------------------------------------------------------------------------------------------------------------------------------------------------------------------------------------------------------------------------------------|
| AC067958<br>AL031548<br>AC068286<br>AC091138<br>AL353685<br>AL592182<br>BX927359 | <div style="background-color: #8B4513; padding: 2px;">AGTAATAACTCCTTATCAGATGTATGCTTTGCAAAATAAAATTTTCCCATTCATGCATCATGTCTTCGTTTTGGTAATT</div> <div style="background-color: #00FF00; padding: 2px;">.....</div> |
|----------------------------------------------------------------------------------|---------------------------------------------------------------------------------------------------------------------------------------------------------------------------------------------------------------------------------------------------------------------------------------------------------------------------------------------------------------------------------------------------------------------------------------------------------------------------------------------------------------------------------------------------------------------------------------------------------------------------|

|                                                                                  |                                                                                                                                                                                                                                                                                                                                                                                                                                                                               |
|----------------------------------------------------------------------------------|-------------------------------------------------------------------------------------------------------------------------------------------------------------------------------------------------------------------------------------------------------------------------------------------------------------------------------------------------------------------------------------------------------------------------------------------------------------------------------|
| AC067958<br>AL031548<br>AC068286<br>AC091138<br>AL353685<br>AL592182<br>BX927359 | <div style="background-color: #00FF00; padding: 2px;">.....</div> |
|----------------------------------------------------------------------------------|-------------------------------------------------------------------------------------------------------------------------------------------------------------------------------------------------------------------------------------------------------------------------------------------------------------------------------------------------------------------------------------------------------------------------------------------------------------------------------|

AC067958  
AL031548

TT  
TGAAAACTTTCTGCTGCAAGAAGCTGGACACAAAAGTTCACGTGTTGTATGACTCCTTTTACATGAAATATGCAGAATAGACAACAAATCCGTAACAGGAAGATGAGGGGTTGCCGGG

```
AC068286
AC091138
AL353685
AL592182
BX927359  GCTTGGGAGTGGGGCAATGGGGAGCGACTGTGTTCATGAACACAGGACTTCTGTTTAGGGTGGTGATCATGCTTCGGAGCTCGGTGGTGGTGGCTGGCTGCACAGCACTGTGAATATACCAA

AC067958
AL031548
AC068286
AC091138
AL353685
AL592182
BX927359  ATGCCACTGAATT
```

**Supp. Figure S7.** Transduction Family: LRE3. Alignment showing L1 transduced sequences, polyadenylation signals and TSDs. The location of primers and restriction enzymes used in TS-ATLAS are also shown. With the exception of AL353685, all L1 sequences were recovered using TS-ATLAS.

**Supp. Table S1. Oligonucleotides**

| <b>Library Construction</b> | <b>Sequence</b>                               |
|-----------------------------|-----------------------------------------------|
| RBMSL2                      | GTGGCGGCCAGTATTCGTAGGAGGGCGCGTAGCATAGAACG     |
| RBMSL3                      | GTGGCGGCCAGTATTCGTAGGAGGGCGCGTAGCATAGAACGCATG |
| RBD3                        | TACGTTCTATGCTAC                               |
| RBD4                        | CGTTCTATGCTACG                                |
| RBD5                        | CGGTTCTATGCTAC                                |
| RBX4                        | GTGGCGGCCAGTATTC                              |
| RBX1                        | GAGGGCGCGTAGCATAGAAC                          |
| RB3PA1                      | ATACCTAATGCTAGATGACACA                        |
| RB980TDA2                   | CAAATTTGTGTACGTTAAATATGTGAAAC                 |
| RB980TDA3                   | TGCTGGTTACACCTCAATAAAGC                       |
| CM958TD1                    | AGAAAAGCAAATGTCTATTCCG                        |
| RB011TD1                    | AAAAAAAAAAAAAAAAAAAAAAAAAGTTTTAAATTT          |
| <b>Genotyping</b>           | <b>Sequence</b>                               |
| RB5PA2                      | TGGAAATGCAGAAATCACCG                          |
| RB3PA2                      | ACCTAATGCTAGATGACACA                          |
| <b>Lineage 2980</b>         |                                               |
| RB980A                      | GGCTGTGGAGAATGCAATTGTAAG                      |
| RB980B                      | GCTCTATTCCCAAGGCC TAGAACA                     |
| CM1604A                     | GAAACCCAACCTCAACGAAA                          |
| CM1604B                     | ATGAACTGGTGGGAATTTGG                          |
| PC4740A                     | CACACCACTGGAGAGATACGCTTT                      |
| PC4740B                     | CACTTGACTTCTCCCAGCTTTCTG                      |
| CM0387A                     | TTGCATTACTTGCTTCAAATTGA                       |
| CM0387B                     | TGCAGAAGGCCTTACGTTTT                          |
| CM8382A                     | ACCTCTCACCCTCCACCAC                           |
| CM8382B                     | CACTGGACAGGCAGAAACAA                          |
| CM1029A                     | CAGCTCAATTCTGGTGGTTG                          |
| CM1029B                     | TTTCTGGTGACAAAGCTTCAGA                        |
| SL0749A                     | CACAGGTTCCCTTCTTCTTTAATCA                     |
| SL0749B                     | TCTCTTGGCCATCAGAAACC                          |
| CM6311A                     | CACAAACCAATATTCCTGACGG                        |
| CM6311B                     | TTTCTGTTGCATTAATTGCTCAAT                      |
| <b>Lineage LRE3</b>         |                                               |
| CM958A                      | GAGGCCATAAATCCCCACAT                          |
| CM958B                      | TGTGGAGTGTCTTCAAACTTTTT                       |
| CM286A                      | TCCTGAACAAC TAATGGGTCAAT                      |
| CM286B                      | CTTGCTCTACCTCTCAACTTTATTGAA                   |
| CM7359A                     | TCCTCACGCACCACACAC                            |
| CM7359B                     | TGCTGTCCTTCTCCTCCTTC                          |
| CM1138A                     | GCAGGAAGAGGGGAATAAGG                          |
| CM1138B                     | TTGAGCTCCCCAGATGAAAG                          |
| CM1584C                     | CACACACGCACAGAGGAAAC                          |
| CM1584D                     | TCATTTCCCGTTAAGAAGTGTG                        |
| CM2182A                     | CAGATTGTGATAAGGGATAAGAAAAA                    |
| CM2182B                     | GTCAGAGGATGGGGATAGAATG                        |
| <b>Lineage RP</b>           |                                               |
| CM011A                      | TCTGCGGCTTCCTGATTGAG                          |
| CM011B                      | TGGAATGCCCC TCAAACAA                          |
| CM0308A                     | GACTCTTTCAGTTGCCAGATGC                        |
| CM0308B                     | CCAGTGTA AAAAGATGCGGCT                        |
| CM5939A                     | CTGGAGAGCACGTTCAAACA                          |
| CM5939B                     | GTGCAGGTGTGTAGGTGTGG                          |

|                |                      |
|----------------|----------------------|
| <b>CM5888A</b> | TCTGCTGTGCTTTTGCATTC |
| <b>CM5888B</b> | TCAATGAGCCTCTCCCATTC |

**Supp. Table S1. *continued***

| <b>AL050308 Amplification</b> | <b>Sequence</b>              |
|-------------------------------|------------------------------|
| <b>CM0308A</b>                | GACTCTTTCAGTTGCCAGATGC       |
| <b>JM0308D</b>                | TTTGGATTAAAAAGTTTTAAATTGGGGG |

**Supp. Table S2. Naming of previously described L1s**

| <b>Named Here (lineage)</b> | <b>Named Previously</b> | <b>Previously Reported</b>                         |
|-----------------------------|-------------------------|----------------------------------------------------|
| <b>AL118519 (2980)</b>      | L1HS169                 | (Myers et al., 2002)                               |
| <b>AC002980 (2980)</b>      | AC002980                | (Boissinot et al., 2000)<br>(Goodier et al., 2000) |
|                             | L1HS28                  | (Myers et al., 2002)                               |
| <b>AC005939 (RP)</b>        | L1HS58                  | (Myers et al., 2002)                               |
| <b>AP001029 (2980)</b>      | L1HS547 (AC010966)      | (Myers et al., 2002)                               |
|                             | 3-39                    | (Beck et al., 2010)                                |
| <b>AC019288 (RP)</b>        | 3-31                    | (Beck et al., 2010)                                |
| <b>AC004740 (2980)</b>      | 2-53                    | (Beck et al., 2010)                                |
| <b>AL353685 (LRE3)</b>      | 1-5                     | (Beck et al., 2010)                                |
| <b>AL059011 (RP)</b>        | 1-3                     | (Beck et al., 2010)                                |

**Supp. Table S3. Transduction lineage elements identified in the 1000 Genomes (Pilot 1-3) datasets**

| <b>Element (lineage)</b> | <b>5' Supporting reads</b>                                                                                                                                                        | <b>3' Supporting reads</b>                                                                     |
|--------------------------|-----------------------------------------------------------------------------------------------------------------------------------------------------------------------------------|------------------------------------------------------------------------------------------------|
| <b>AL050308 (RP)</b>     | SRR013212.480276<br>SRR013225.652575<br>SRR004906.392373<br>SRR004997.233490                                                                                                      | SRR003250.1197183                                                                              |
| <b>AC005888 (RP)</b>     | SRR006365.408575                                                                                                                                                                  | SRR001480.201107                                                                               |
| <b>AC019288 (RP)</b>     | SRR003245.794304                                                                                                                                                                  |                                                                                                |
| <b>AC004740 (2980)</b>   | SRR006852.240011                                                                                                                                                                  | SRR007034.92258                                                                                |
| <b>AC048382 (2980)</b>   | SRR005985.3024                                                                                                                                                                    |                                                                                                |
| <b>AP001029 (2980)</b>   | SRR003796.581896<br>SRR003691.520238<br>SRR003691.496284                                                                                                                          |                                                                                                |
| <b>AC010749 (2980)</b>   | SRR005998.51014<br>SRR005998.274132<br>SRR012163.14231<br>SRR006498.1079198<br>SRR006403.222421<br>SRR005847.1133907<br>SRR005847.1048525<br>SRR005847.1179564<br>SRR002559.66275 | SRR005990.872145<br>SRR006505.98087<br>SRR005846.277534<br>SRR002441.10489<br>SRR004438.356014 |
| <b>AC067958 (LRE3)</b>   | SRR006499.541055<br>SRR006505.1078808<br>SRR003619.389189                                                                                                                         |                                                                                                |

**Supp. References**

- 1000 Genomes Project Consortium, Abecasis GR, Altshuler D, Auton A, Brooks LD, Durbin RM, Gibbs RA, Hurles ME, McVean GA. 2010. A map of human genome variation from population-scale sequencing. *Nature*. 2010 Oct 28;467(7319):1061-73.
- Beck C.R., Collier P., Macfarlane C., Malig M., Kidd J.M., Eichler E.E., Badge R.M. and Moran J.V. 2010. LINE-1 retrotransposition activity in human genomes. *Cell*, 141, 1159-1170.
- Boissinot S., Chevret P. and Furano A.V. 2000. L1 (LINE-1) retrotransposon evolution and amplification in recent human history. *Mol Biol Evol*, 17, 915-28.
- Brouha B., Meischl C., Ostertag E., de Boer M., Zhang Y., Neijens H., Roos D. and H. K.H., Jr. 2002. Evidence consistent with human L1 retrotransposition in maternal meiosis I. *Am J Hum Genet*, 71, 327-36.
- Goodier J.L., Ostertag E.M. and H. K.H., Jr. 2000. Transduction of 3'-flanking sequences is common in L1 retrotransposition. *Hum Mol Genet*, 9, 653-7.
- Kimberland M.L., Divoky V., Prchal J., Schwahn U., Berger W. and H. K.H., Jr. 1999. Full-length human L1 insertions retain the capacity for high frequency retrotransposition in cultured cells. *Hum Mol Genet*, 8, 1557-60.
- Myers J.S., Vincent B.J., Udall H., Watkins W.S., Morrish T.A., Kilroy G.E., Swergold G.D., Henke J., Henke L., Moran J.V. et al. 2002. A comprehensive analysis of recently integrated human L1 elements. *Am J Hum Genet*, 71, 312-26.
- Zhang Z, Schwartz S, Wagner L, Miller W. 2000. A greedy algorithm for aligning DNA sequences. *J Comput Biol*. 1-2:203-14.
